# Supplementary material for: Persisting roadblocks in arthropod monitoring using non-destructive metabarcoding from collection media of passive traps
Source: PeerJ journal article supplement (doi:10.7717/peerj.16022), 2023-10-10

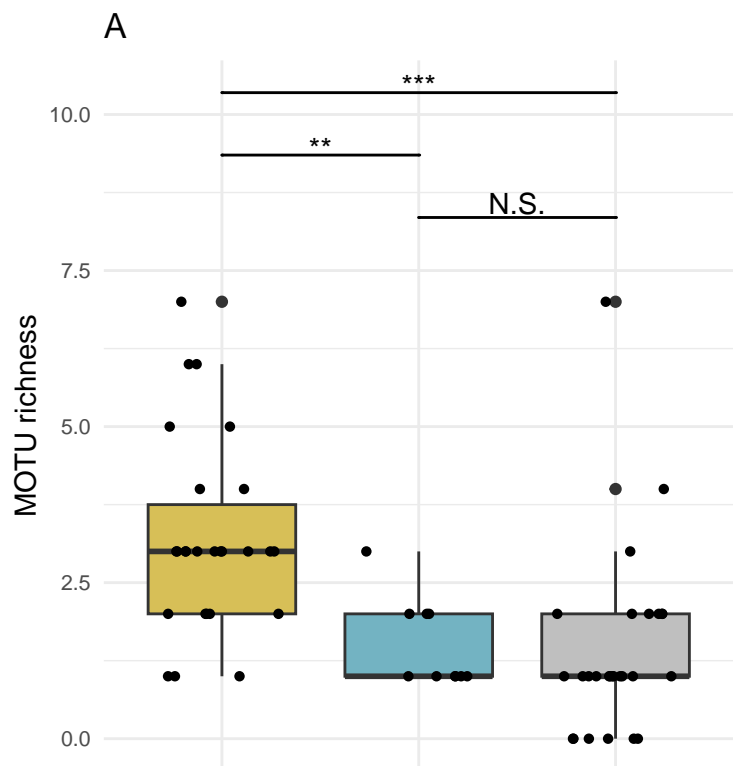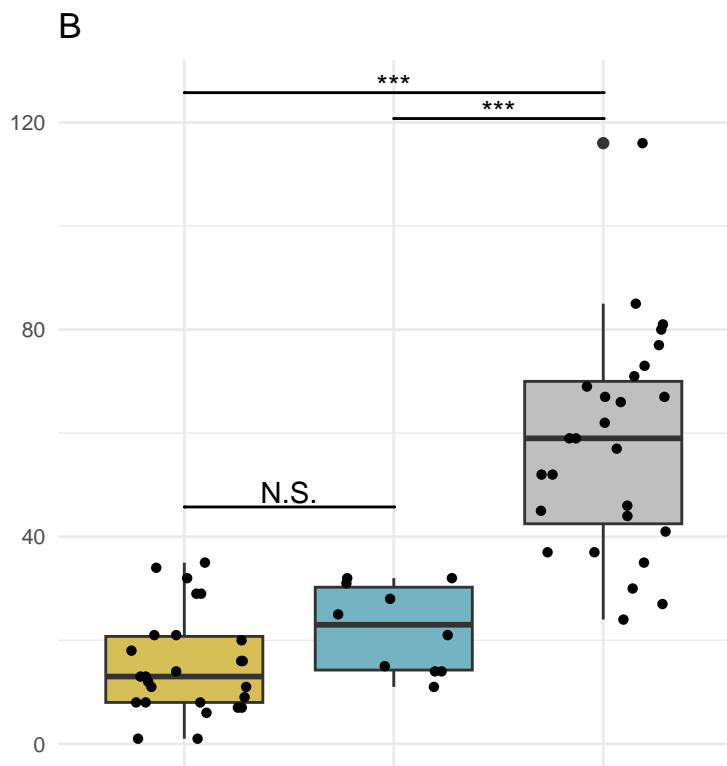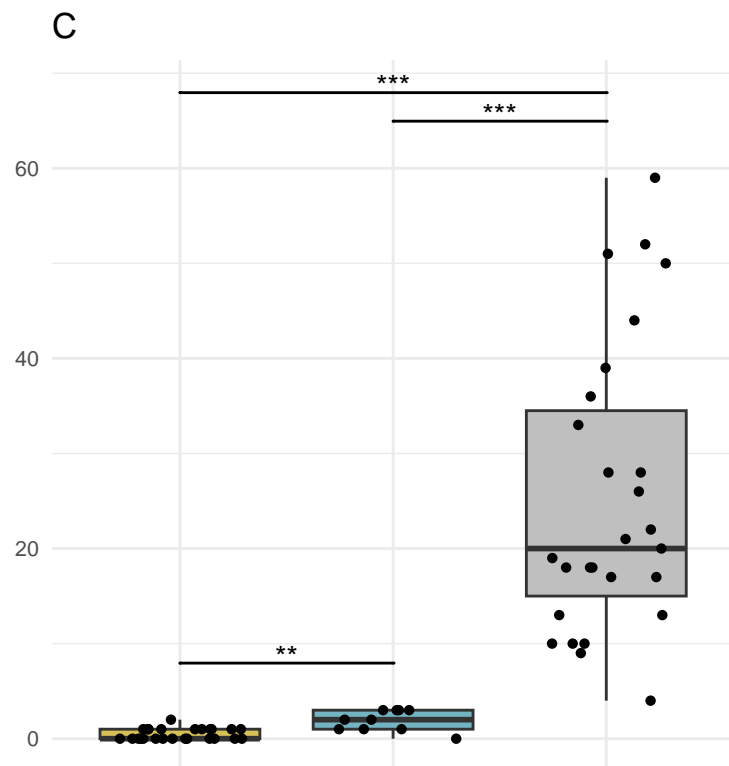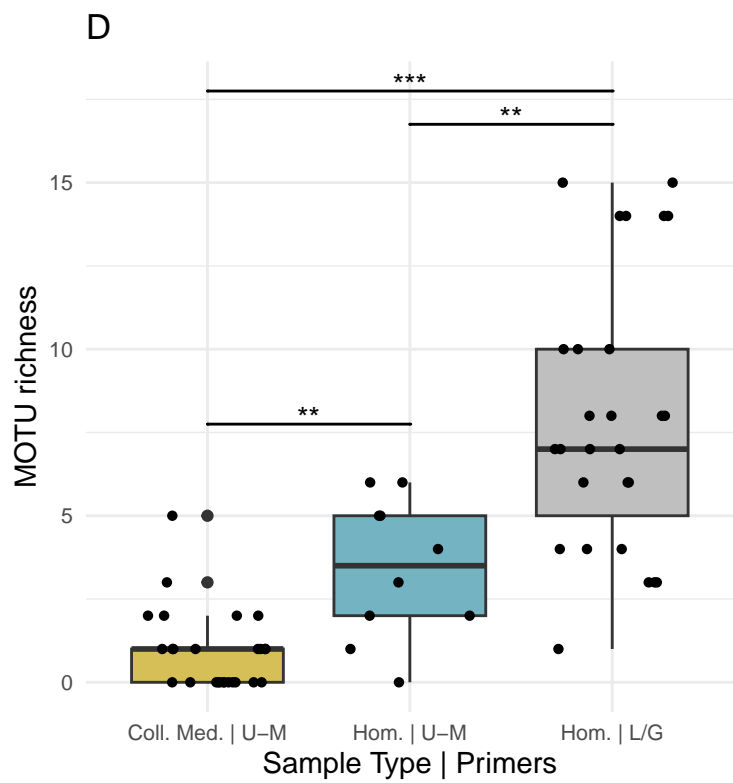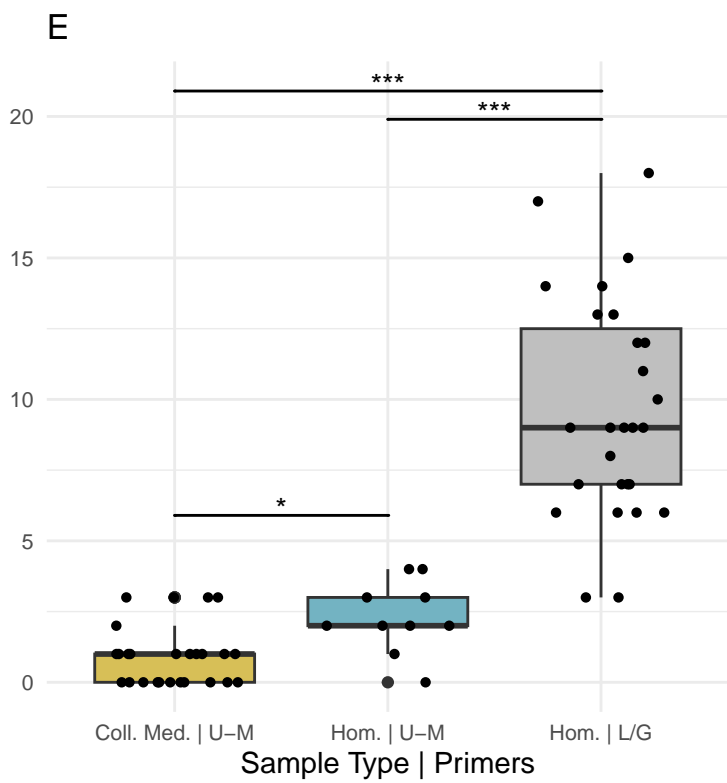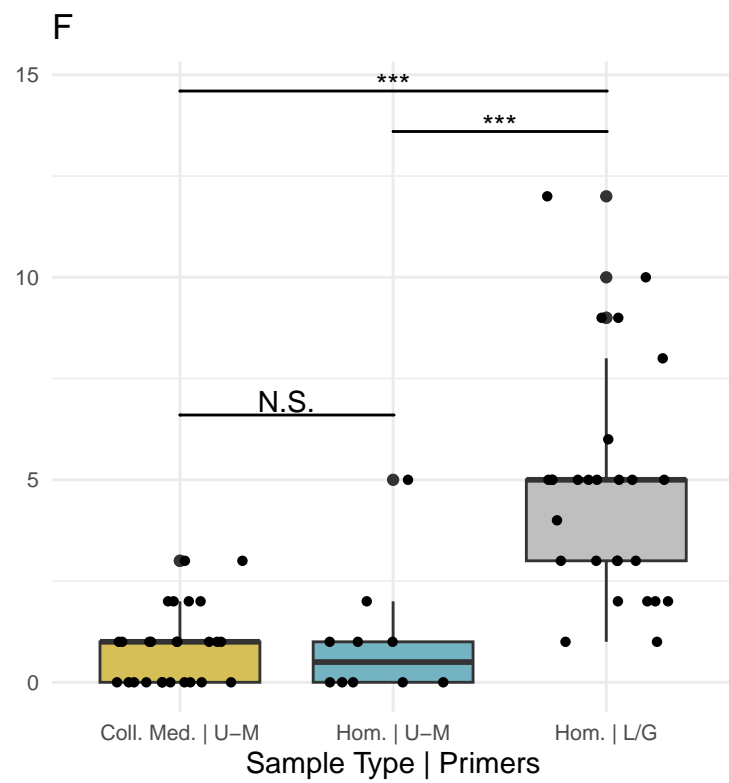

Supplement: SF2_reviewed.pdf [file SF2_reviewed.pdf]
